# Supplementary material for: The adjacent effect between Gd(iii) and Cu(ii) in layered double hydroxide nanoparticles synergistically enhancesT1-weighted magnetic resonance imaging contrast
Source: Royal Society of Chemistry journal article supplement (doi:10.1039/d2nh00478j), 2022-12-22
Supplement: d2nh00478j1.pdf [file d2nh00478j1.pdf]

Supporting Information for

# Adjacent effect between Gd(III) and Cu(II) in layered double hydroxide nanoparticles synergistically enhances T<sub>1</sub>-weighted magnetic resonance imaging contrast

*Jianping Liu,<sup>a</sup> Li, Li,<sup>a</sup> Run Zhang,<sup>\*,a</sup> Zhi Ping Xu<sup>\*,a,b</sup>*

<sup>a</sup> Australian Institute for Bioengineering and Nanotechnology (AIBN), The University of Queensland, St Lucia, QLD 4072, Australia.

<sup>b</sup> Institute of Biomedical Health Technology and Engineering and Institute of Systems and Physical Biology, Shenzhen Bay Laboratory. Shenzhen, P. R. China 518107.

\* Corresponding authors.

Email: [gordonxu@uq.edu.au](mailto:gordonxu@uq.edu.au) (Z. P. Xu); [r.zhang@uq.edu.au](mailto:r.zhang@uq.edu.au) (R. Zhang)

## 1. Supporting Figures

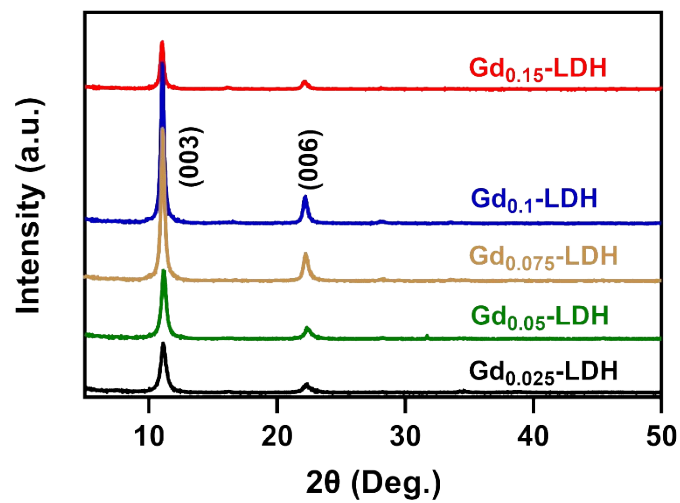

Fig. S1. XRD patterns of a series of Gd<sub>x</sub>-LDH.

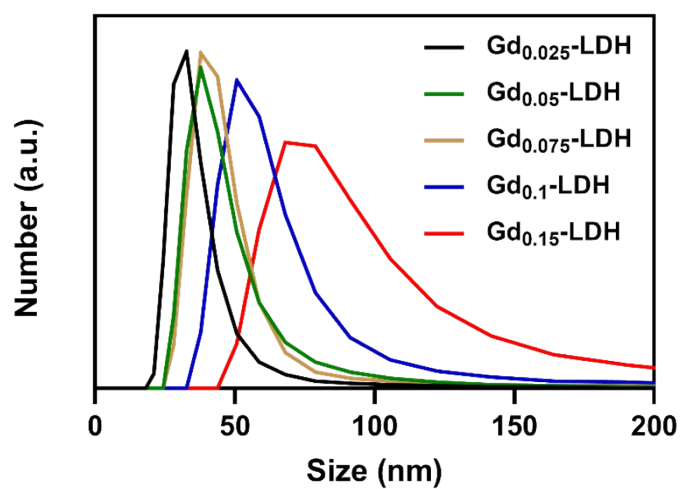

Fig. S2. Size distributions of a series of Gd<sub>x</sub>-LDH.

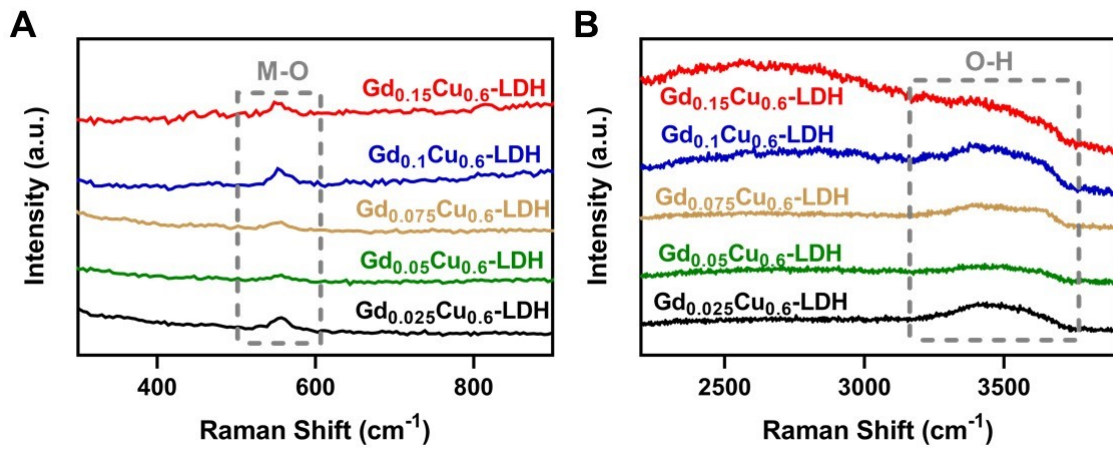

**Fig. S3.** Raman spectra of a series of  $Gd_xCu_{0.6}$ -LDH with the wavelength (A) 300-900  $cm^{-1}$  and (B) 2200-3900  $cm^{-1}$ .

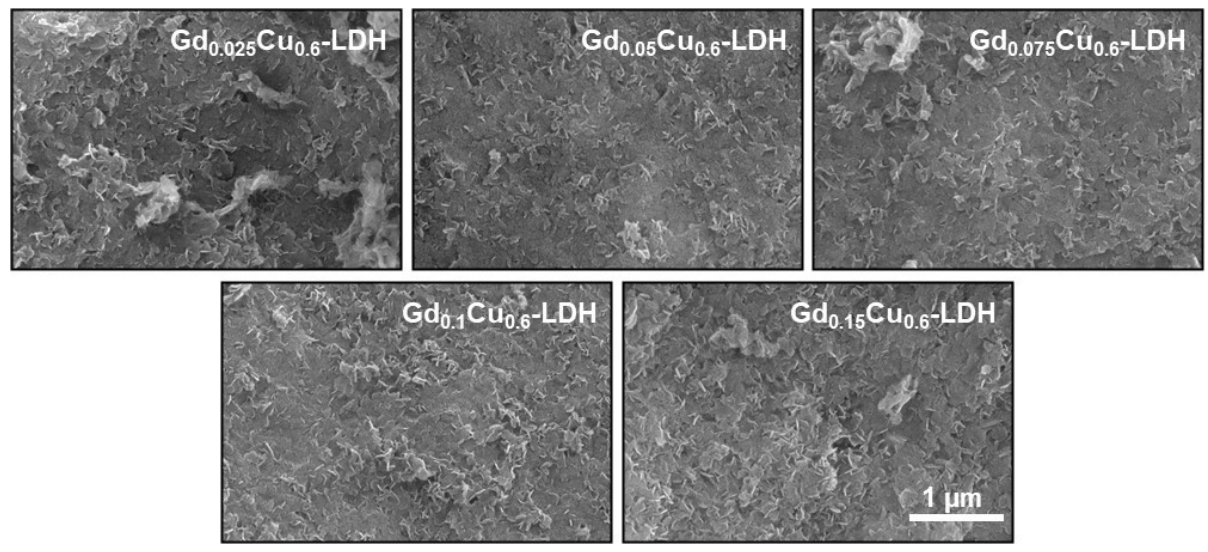

**Fig. S4.** SEM images of a series of  $Gd_xCu_{0.6}$ -LDH.

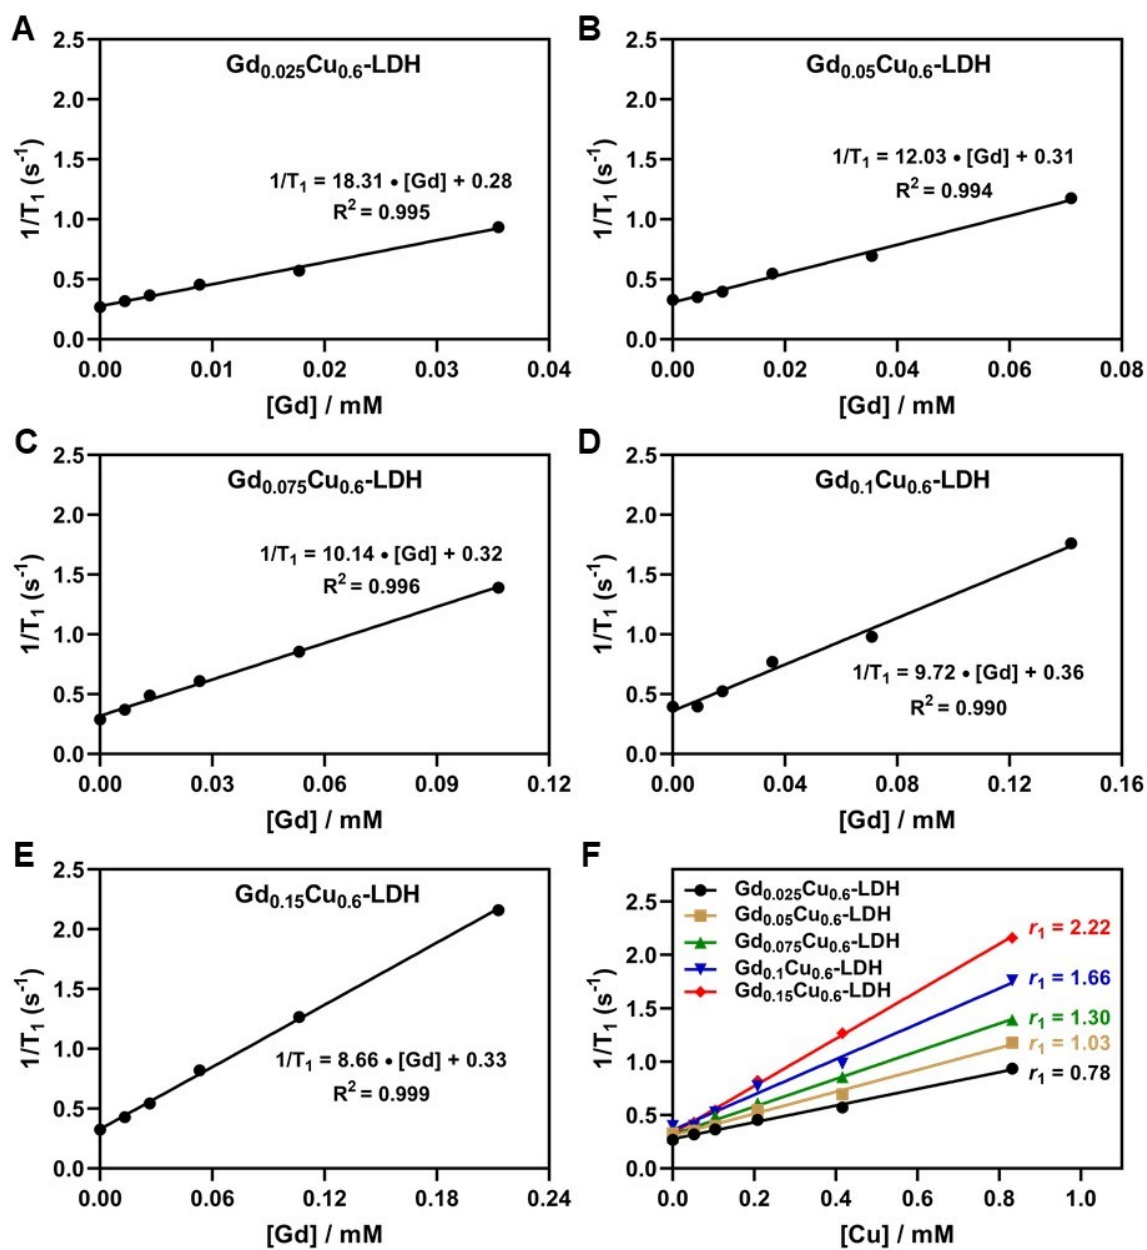

**Fig. S5.**  $T_1$ -weight relaxation of  $\text{Gd}_x\text{Cu}_{0.6}\text{-LDH}$ . Plot of  $1/T_1$  versus (A-E) Gd concentration and (F) Cu concentration of a series of  $\text{Gd}_x\text{Cu}_{0.6}\text{-LDH}$ .

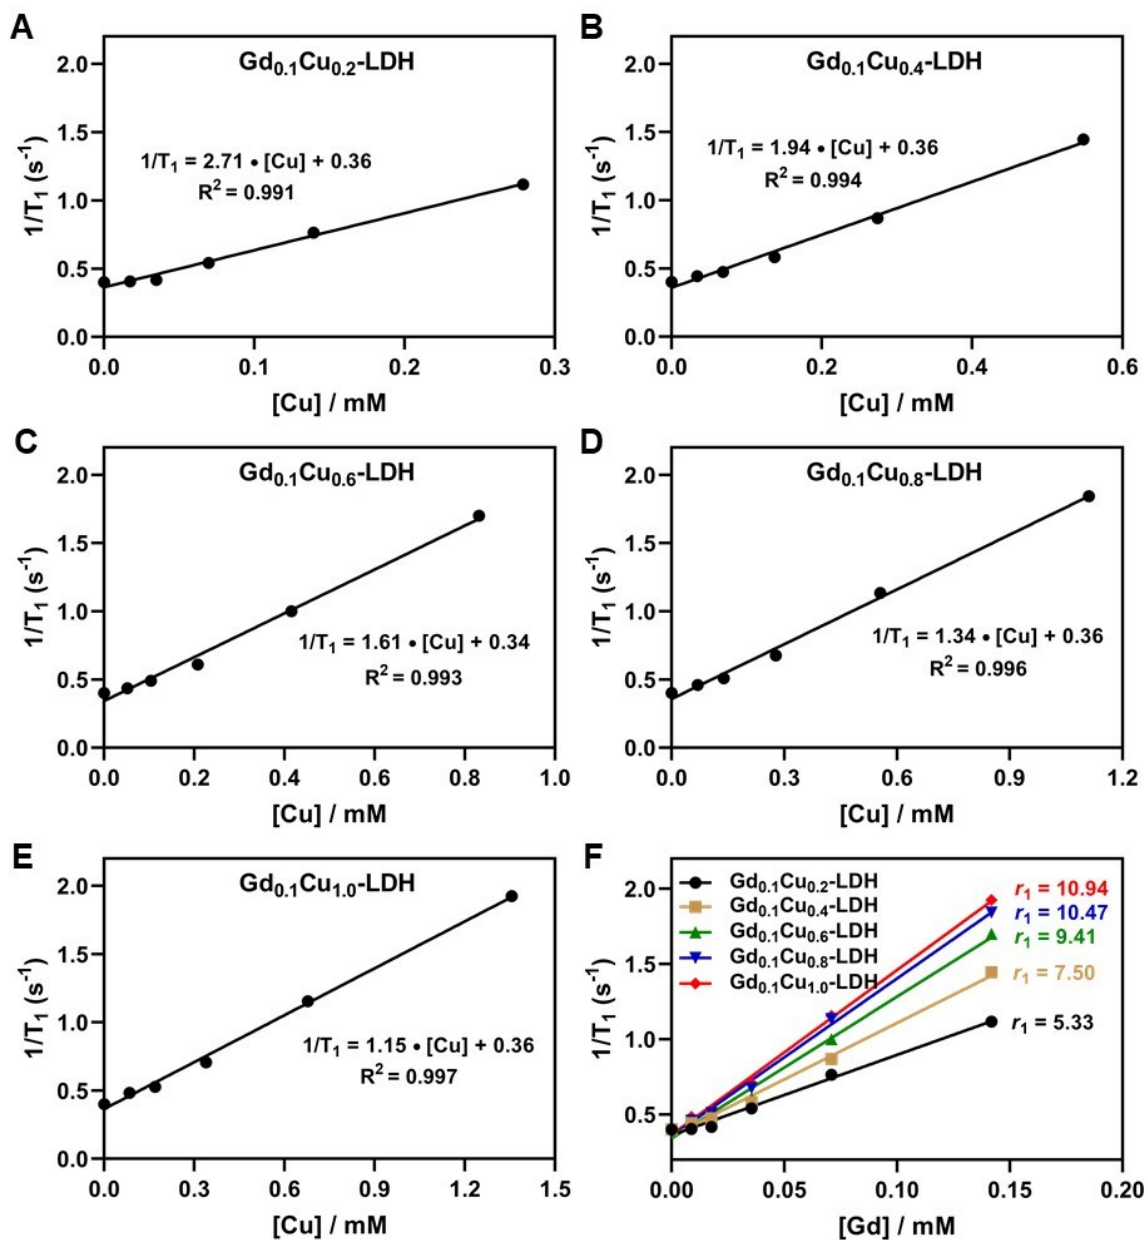

**Fig. S6.**  $T_1$ -weight relaxation of  $\text{Gd}_{0.1}\text{Cu}_y\text{-LDH}$ . Plot of  $1/T_1$  versus (A-E) Cu concentration and (F) Gd concentration of a series of  $\text{Gd}_{0.1}\text{Cu}_y\text{-LDH}$ .

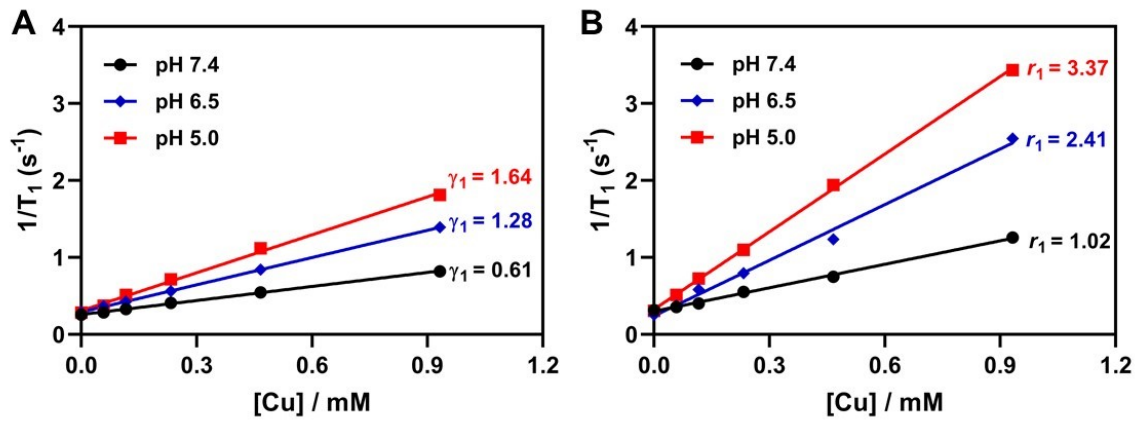

**Fig. S7.** pH-dependent MRI performance. Plot of  $1/T_1$  versus Cu concentration of (A) Cu-LDH and (B) GdCu-LDH (in terms of  $[Cu]$ ) after co-incubation in different pH buffer solutions for 4 h.

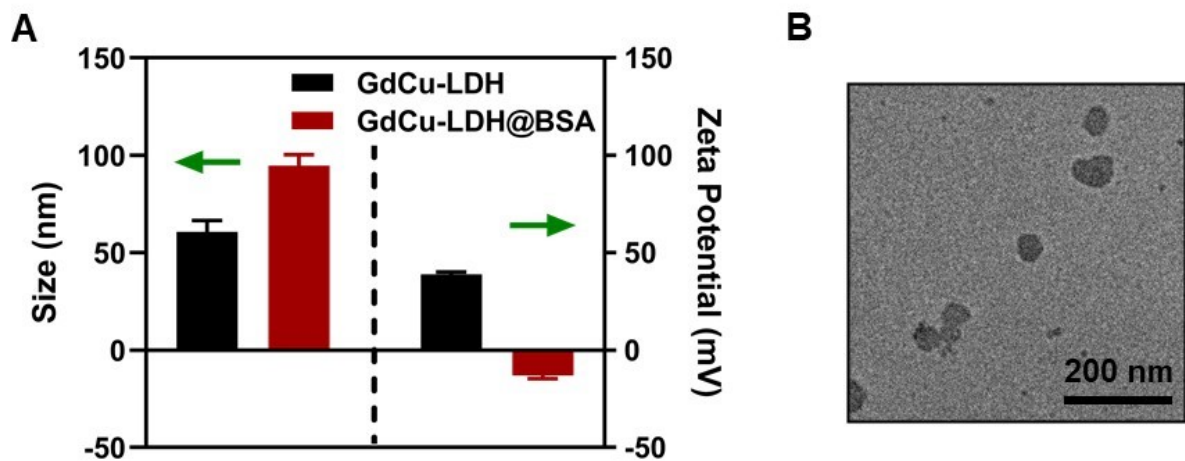

**Fig. S8.** (A) Particle size and zeta potential of GdCu-LDH and GdCu-LDH@BSA. (B) TEM image of GdCu-LDH@BSA.

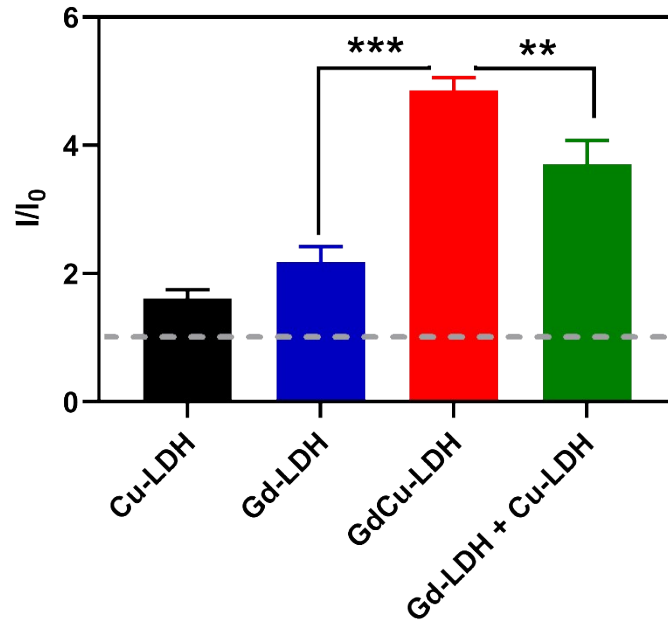

**Fig. S9.** MRI signal intensity of Cu-LDH, Gd-LDH, GdCu-LDH and analyzed Gd-LDH + Cu-LDH at 24 h post iv injection.  $I_0$  and  $I$ : MRI signal intensity of the mice tumors before injection and at 24 h point post injection, respectively. Grey dash line represents the background MRI signal intensity. \*\*:  $p < 0.01$ ; \*\*\*:  $p < 0.001$ .

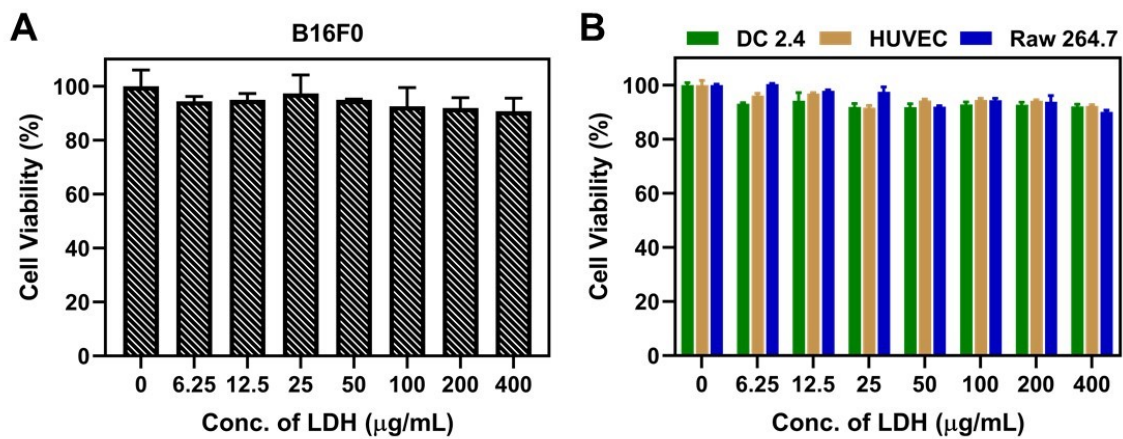

**Fig. S10.** Cytotoxicity evaluation of GdCu-LDH in B16F0 cells (A) and normal cells (B).

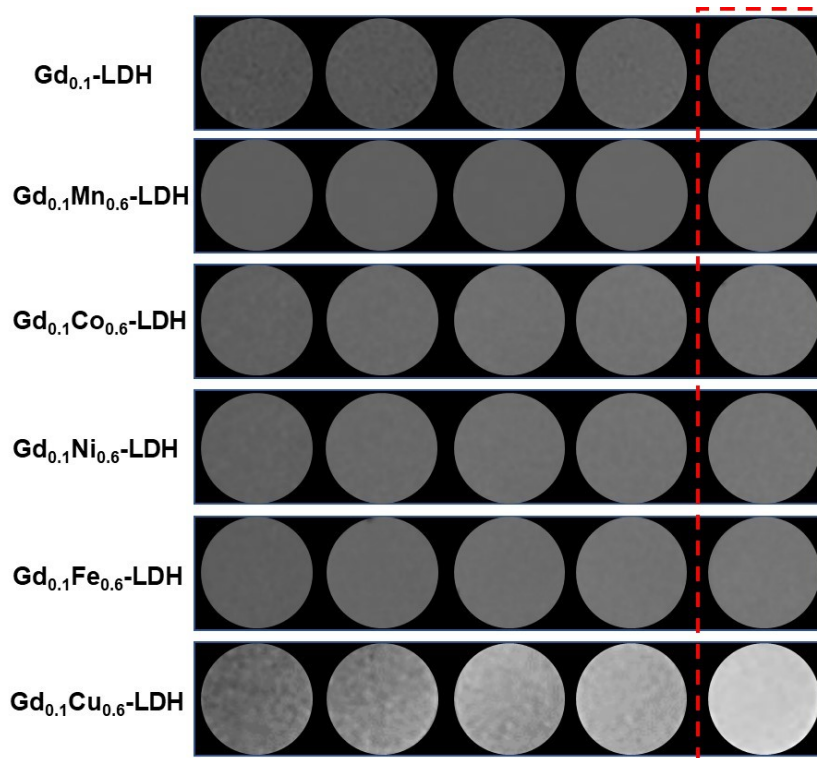

**Fig. S11.** T<sub>1</sub>-weighted MR images of Gd<sub>0.1</sub>M<sub>0.6</sub>-LDH (M = Mn, Co, Ni, Fe, Cu).

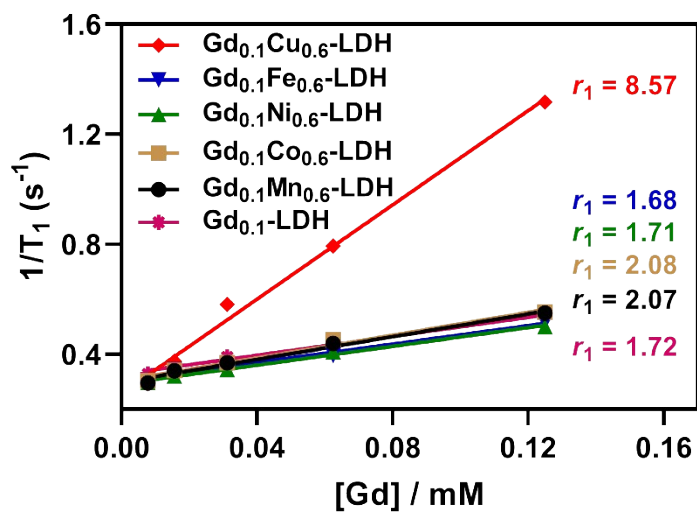

**Fig. S12.** Plot of 1/T<sub>1</sub> versus Gd concentration of Gd<sub>0.1</sub>M<sub>0.6</sub>-LDH (M = Mn, Co, Ni, Fe, Cu).



## 2. Supporting Tables

**Table S1.** Particle size, zeta potential, (003) position and element composition of Gd<sub>x</sub>-LDH (x = 0.025, 0.05, 0.075, 0.1, and 0.15).

| Samples                  | Size (nm) | Zeta (mV) | Position 2θ (°) | Calculated Chemical Formula                                                                   |
|--------------------------|-----------|-----------|-----------------|-----------------------------------------------------------------------------------------------|
| Gd <sub>0.025</sub> -LDH | 35.6      | 36.7      | 11.12           | Mg <sub>3</sub> Al <sub>0.974</sub> Gd <sub>0.026</sub> (OH) <sub>8.0</sub> Cl <sub>1.0</sub> |
| Gd <sub>0.05</sub> -LDH  | 45.3      | 31.7      | 11.15           | Mg <sub>3</sub> Al <sub>0.948</sub> Gd <sub>0.052</sub> (OH) <sub>8.0</sub> Cl <sub>1.0</sub> |
| Gd <sub>0.075</sub> -LDH | 45.7      | 38.2      | 11.07           | Mg <sub>3</sub> Al <sub>0.925</sub> Gd <sub>0.075</sub> (OH) <sub>8.0</sub> Cl <sub>1.0</sub> |
| Gd <sub>0.1</sub> -LDH   | 63.7      | 36.2      | 11.05           | Mg <sub>3</sub> Al <sub>0.898</sub> Gd <sub>0.102</sub> (OH) <sub>8.0</sub> Cl <sub>1.0</sub> |
| Gd <sub>0.15</sub> -LDH  | 94.2      | 32.6      | 11.03           | Mg <sub>3</sub> Al <sub>0.847</sub> Gd <sub>0.153</sub> (OH) <sub>8.0</sub> Cl <sub>1.0</sub> |

**Table S2.** Particle size, zeta potential, (003)  $2\theta$  value and element composition of  $Gd_xCu_{0.6}$ -LDH.

| Samples                   | Size<br>(nm) | Zeta<br>(mV) | Position<br>$2\theta$ ( $^\circ$ ) | Calculated Chemical Formula                                |
|---------------------------|--------------|--------------|------------------------------------|------------------------------------------------------------|
| $Gd_{0.025}Cu_{0.6}$ -LDH | 50.5         | 36.9         | 11.07                              | $Mg_{2.46}Al_{0.974}Gd_{0.026}Cu_{0.54}(OH)_{8.0}Cl_{1.0}$ |
| $Gd_{0.05}Cu_{0.6}$ -LDH  | 52.2         | 39.7         | 11.15                              | $Mg_{2.42}Al_{0.948}Gd_{0.052}Cu_{0.58}(OH)_{8.0}Cl_{1.0}$ |
| $Gd_{0.075}Cu_{0.6}$ -LDH | 56.0         | 30.3         | 11.07                              | $Mg_{2.45}Al_{0.925}Gd_{0.075}Cu_{0.55}(OH)_{8.0}Cl_{1.0}$ |
| $Gd_{0.1}Cu_{0.6}$ -LDH   | 58.4         | 34.0         | 11.07                              | $Mg_{2.42}Al_{0.898}Gd_{0.102}Cu_{0.58}(OH)_{8.0}Cl_{1.0}$ |
| $Gd_{0.15}Cu_{0.6}$ -LDH  | 129          | 34.8         | 11.01                              | $Mg_{2.43}Al_{0.847}Gd_{0.153}Cu_{0.57}(OH)_{8.0}Cl_{1.0}$ |
